# Supplementary material for: Physically based model for gully simulation: application to the Brazilian semiarid region
Source: Copernicus journal article supplement (doi:10.5194/hess-24-4239-2020), 2020-08-28
Supplement: Supplementary file 1 [file Supplement - hess-2019-460.pdf › Supplement - hess-2019-460.pdf]

# Physically-based model for gully simulation: application to the Brazilian Semi-arid Region - Supplement

Pedro Henrique Lima Alencar<sup>1,2</sup>, José Carlos de Araújo<sup>2</sup>, and Adunias dos Santos Teixeira<sup>2</sup>

<sup>1</sup>TU Berlin, Institut für Ökologie, 10587 Berlin, Germany

<sup>2</sup>Federal University of Ceará, Departamento de Engenharia Agrícola, Fortaleza, Brazil

**Correspondence:** Pedro Alencar (pedro.alencar@campus.tu-berlin.de); José Carlos de Araújo (jcaraujo@ufc.br)

## 1 Rain data

Daily rainfall data from the Foundation of Meteorology and Water Resources of Ceará (FUNCEME) were used in the study. The interval of the study was nearly sixty years and to cover the whole period, data from three stations were used:

1. From 1958 to 1973: Station Coroaá (5.03° S; 39.33° W)
- 5 2. From 1974 to 1987: Station Boa Viagem (5.12° S; 39.73° W)
3. From 1988 onward: Station Madalena (4.85° S; 39.57° W)
4. Validation: Station Uruquê (5.14° S; 39.18° W)
5. Validation: Station Paus Ferro (4.99° S; 39.48° W)

All stations were equipped with Pluviometer Ville de Paris with a standard opening of 400 cm<sup>2</sup>. The final rain series is presented in Figure S1. To assess the quality of the data series, double mass analysis with other stations in the vicinity was performed, as illustrated in Figure S2, from which we can see that there is no relevant bias in the data.

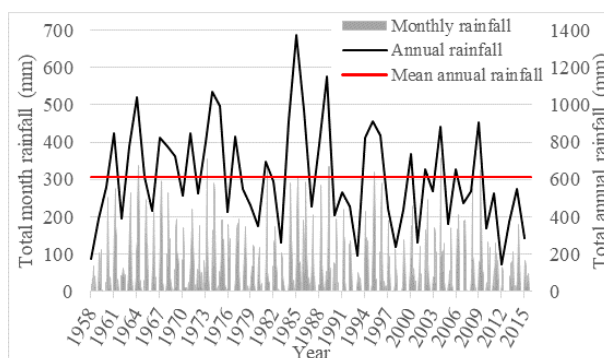

**Figure S1.** Rain series with monthly (left vertical axes) and yearly (right vertical axes) rainfall. The red line indicates the average annual rainfall (over 600 mm yr<sup>-1</sup>)

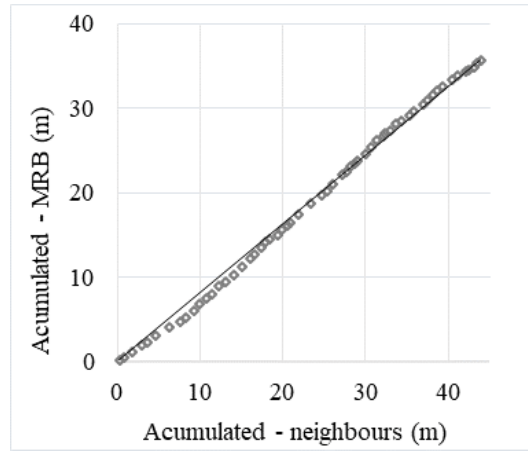

**Figure S2.** Double mass diagram. Neighbour stations in a radius of 50 km.

## 2 Gully models from literature

### 2.1 Foster and Lane Model (FLM)

The Foster and Lane (1983) ephemeral-gully model aims at explaining “erosion by concentrated flow in farm fields” for single runoff intensive events. The gullies are considered ephemeral as productive farmlands usually provide periodic tillage to diminish or remove the gullies generated by previous events. The model is physically based and uses the Manning equation, mass balance, and shear stress mobilisation; it assumes an equilibrium channel width and the gully evolution in two steps. The first step is the vertical incision when the concentrated overflow starts digging the channel with a constant width. The second step starts after the bottom of the channel reaches a non-erodible layer. Then, the section starts a sideward erosive process, widening until the end of the effective runoff, i.e., with a shear stress below the critical stress. Detachment ratio ( $D_r$ ) and shear stress ( $\tau$ ) are given by the Equations (1) and (2).

$$D_r = K_r (\tau - \tau_c) \quad (1)$$

$$\tau(X) = 1.35\gamma R_h S \left[ 1 - \left( 1 - 2 \frac{X}{WP} \right)^{2.9} \right] \quad (2)$$

In Equation 2,  $X$  is the position of a point on the channel bed, varying from zero to  $WP$  (wet perimeter).  $S$  is the longitudinal slope of the channel;  $r_h$  the hydraulic radius; and  $\gamma$  is the specific gravity of water (assumed  $9.81 \text{ kN m}^{-3}$ ).

In order to model long-term gullies using Foster and Lane (1983) equations, the following assumptions were made: First, all mobilised sediment is carried away by the discharges, i.e., there is no sediment deposition on the channel bed. This assumption was confirmed by field surveys in many sections where very little loose sediment was identified. Secondly, in the long run, the

30 effect of each intense runoff can be piled in a cumulative model of widths/depths layers. This implies that each erosive event does not suffer significant influence of the previous, and the total eroded soil is related only with the energy of each event. The piling process considered all events with runoff. The following figures display the flow charts for the original Foster and Lane Model and how it allows to model multiple events by piling area available in the supplementary material (Fig. S3 and S4).

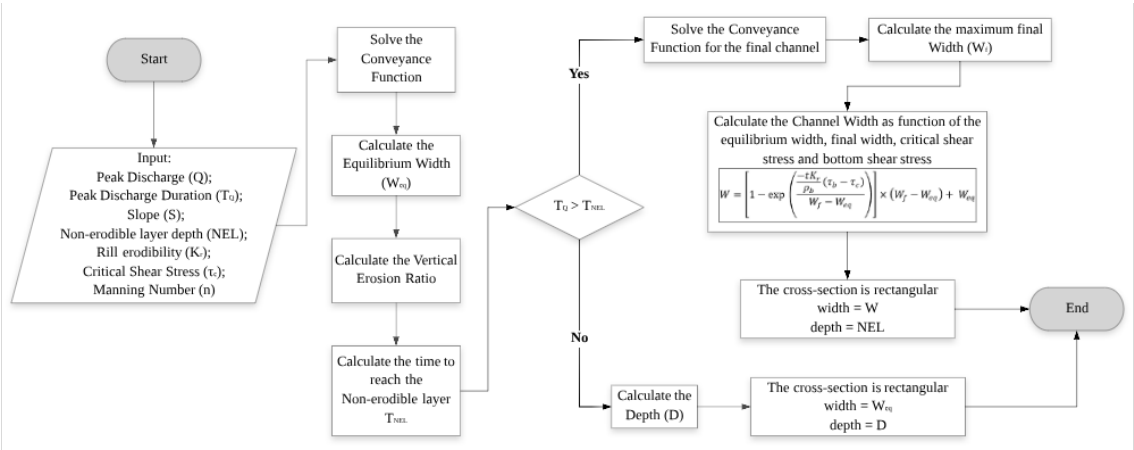

**Figure S3.** Flowchart of the original Foster and Lane Model (1983)

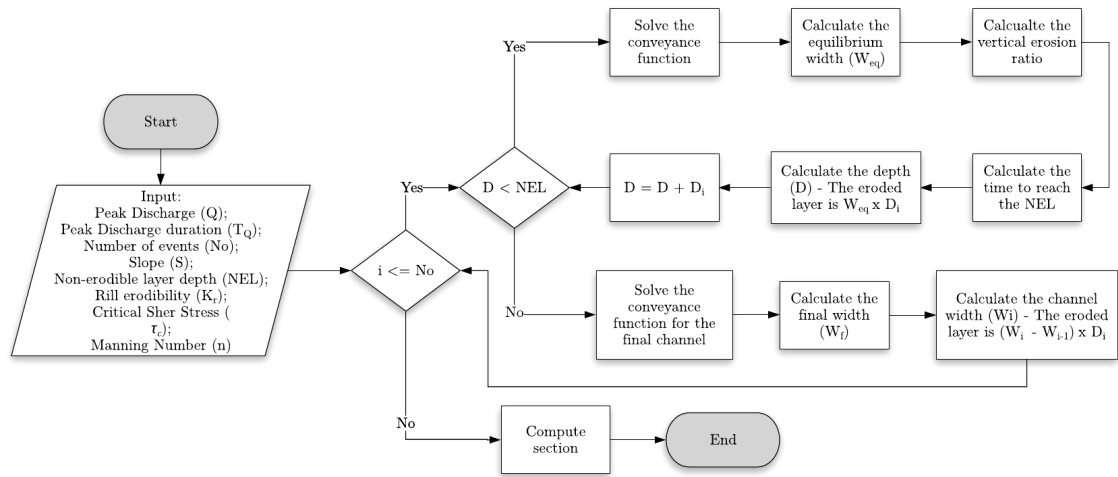

**Figure S4.** Flowchart of the modified Foster and Lane Model, in order to allow multiple successive events.

### 2.2 Sidorchuk Model (SM)

35 The Sidorchuk model (Sidorchuk, 1999) is both physically and empirically based. It considers mass balance of sediment, shear stress (in terms of critical velocity), soil cohesion and the Manning equation to estimate the cross-section geometry and

channel slope. It also uses empirical equations based on field measurement to estimate the flow depth and width. The model gives special attention to the processes involving gully wall transformation, as shown in Equations (3) and (4).

$$D_{vcr} = \frac{2C_h}{g \rho_s} \cos(\varphi) \sin^{-2} \left[ \frac{1}{2} \left( \varphi + \frac{\pi}{2} \right) \right] \quad (3)$$

$$40 \quad \frac{C_h}{g \rho_s D_v} = \frac{\rho_s - w\rho}{\rho} \tan \varphi \cos^2 \phi - \frac{\sin 2\phi}{2} \quad (4)$$

In Equations (3) and (4),  $C_h$  is soil cohesion;  $D_v$  the depth incision;  $D_{vcr}$  the critical value of depth for wall failure;  $w$  the volumetric soil water content;  $\rho_s$  the bulk density of the soil;  $\rho$  the density of water;  $g$  gravity's acceleration;  $\varphi$  the soil internal friction angle; and  $\phi$  the wall slope, in degrees. A flow chart of the model is available in the supplementary material (Fig. S5).

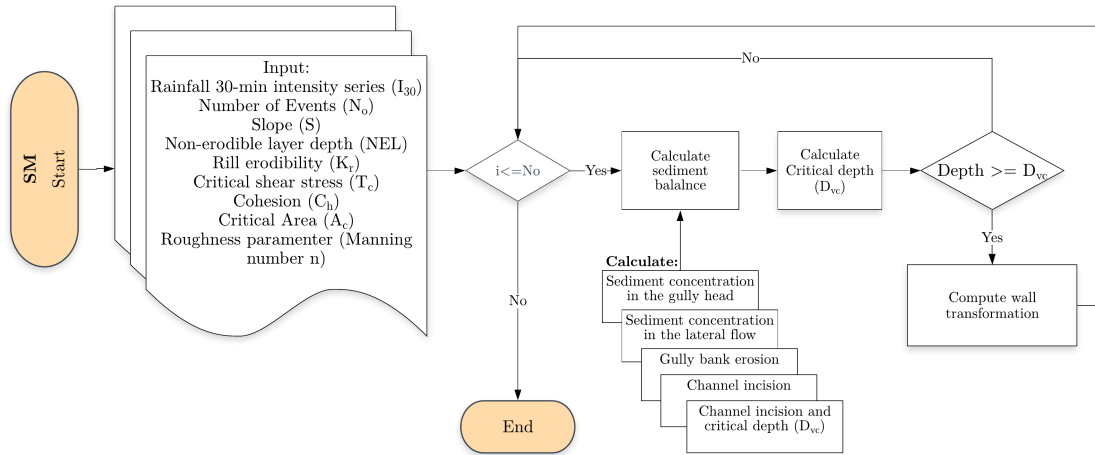

**Figure S5.** Flowchart of the Sidorchuk Model (1999).

### 3 Model evaluators

45 To allow us to assess a more realistic, concerning uncertainty, evaluation of the model's quality, we implemented the routine proposed by Ritter and Muñoz-Carpena (2013). The routine, called FITEVAL, allows the modeller to obtain a confidence interval for the Nash-Sutcliffe Efficiency (NSE). The common values of NSE is, therefore, interpreted as the centre of this interval and of the probabilistic distribution of its values depending on how the data are resampled. The method classifies the model as Acceptable to Very good –  $NSE \in [0.66, 0.95]$ ; ( $p$ -value = 0.05). A conservative interpretation of these results is to

50 understand the lowest values as the minimum state of information, i.e., the one that contains (almost) no unproved hypothesis and does not rely on luck. Therefore, the model can be classified, in the worst case scenario, as Acceptable. The output of the

FITEVAL is presented in (Figure S6). On the left we see a scatter of points Computed (modelled) and Observed (measured) points, corresponding to the cross-section areas. Below, we have a list of the percentiles of each category. On the right we have the cumulative probabilistic distribution of values of efficiency and below that, a plot showing the observed (diamonds) and computed (continuous line) in decreasing order.

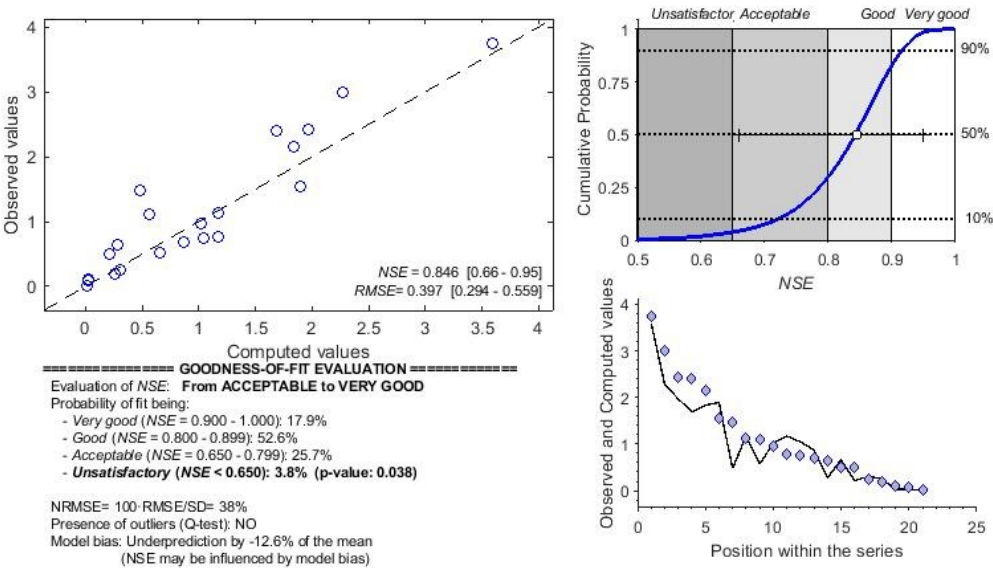

**Figure S6.** Output of FITEVAL (Ritter and Muñoz-Carpena, 2013), indicating the model proposed as, in the worst case scenario, acceptable. On the left we have a scatter plot of modelled and measured data, on the right the cumulative probability distribution of NSE (top) and the values of measured (black line) and modelled (diamond) in decreasing order (bottom).

#### 4 General data and code

Following we present basic data and results used in the model and the code used. For more, please access the following link for the permanent repository:

[github.com/PedroAlencarTUB/GullyModel-FLSM](https://github.com/PedroAlencarTUB/GullyModel-FLSM)

| Gully   | Section | Basin Area<br>(m <sup>2</sup> ) | Perimeter<br>(m) | Length (m) | Kc    | Kf    | Conc. Time<br>(s) | Area (m <sup>2</sup> ) | Perimeter (m) | Width (m) | Prof  |
|---------|---------|---------------------------------|------------------|------------|-------|-------|-------------------|------------------------|---------------|-----------|-------|
| Gully 1 | S1      | 3200                            | 432.5            | 195        | 2.141 | 0.084 | 25                | 0.248                  | 2.322         | 2.264     | 0.215 |
|         | S2      | 3080                            | 415.5            | 187.8      | 2.096 | 0.087 | 23                | 0.742                  | 3.451         | 3.188     | 0.582 |
|         | S3      | 1183                            | 337.4            | 179.3      | 2.747 | 0.037 | 22                | 0.684                  | 3.734         | 3.558     | 0.498 |
|         | S4      | 491                             | 107.7            | 35.9       | 1.361 | 0.381 | 6                 | 0.505                  | 3.826         | 3.763     | 0.288 |
|         | S5      | 78                              | 49.8             | 22.9       | 1.579 | 0.149 | 5                 | 0.084                  | 1.520         | 1.498     | 0.103 |
|         | S6      | 3060                            | 408              | 184.5      | 2.065 | 0.090 | 23                | 0.770                  | 2.707         | 2.180     | 0.709 |
| Gully 2 | S1      | 2000                            | 383              | 123        | 2.398 | 0.132 | 31                | 0.721                  | 2.235         | 1.853     | 0.479 |
|         | S2      | 1870                            | 379              | 114.3      | 2.454 | 0.143 | 29                | 2.428                  | 7.559         | 7.322     | 0.694 |
|         | S3      | 1470                            | 336              | 99.7       | 2.454 | 0.148 | 28                | 1.105                  | 6.950         | 6.891     | 0.307 |
|         | S4      | 252                             | 79.9             | 23.5       | 1.409 | 0.456 | 7                 | 0.644                  | 3.085         | 2.951     | 0.356 |
|         | S5      | 40                              | 43.7             | 12.4       | 1.935 | 0.260 | 4                 | 0.008                  | 0.488         | 0.479     | 0.033 |
|         | S6      | 1930                            | 381              | 119        | 2.428 | 0.136 | 30                | 2.403                  | 7.633         | 7.438     | 0.653 |
|         | S7      | 1425                            | 320              | 92.2       | 2.374 | 0.168 | 25                | 1.470                  | 6.263         | 6.163     | 0.451 |
| Gully 3 | S1      | 3500                            | 554              | 204        | 2.622 | 0.084 | 40                | 1.126                  | 6.459         | 6.321     | 0.521 |
|         | S2      | 3400                            | 540              | 193        | 2.593 | 0.091 | 39                | 0.962                  | 5.596         | 5.543     | 0.306 |
|         | S3      | 1000                            | 248              | 105        | 2.196 | 0.091 | 25                | 0.200                  | 2.239         | 2.181     | 0.198 |
|         | S4      | 56                              | 49.1             | 13.9       | 1.837 | 0.290 | 4                 | 0.103                  | 1.351         | 1.303     | 0.117 |
|         | S5      | 2230                            | 473              | 185.7      | 2.805 | 0.065 | 38                | 0.511                  | 3.098         | 3.016     | 0.306 |
|         | S6      | 4800                            | 620              | 213        | 2.506 | 0.106 | 43                | 3.751                  | 6.485         | 6.057     | 0.897 |
|         | S7      | 4964                            | 639              | 218        | 2.539 | 0.104 | 45                | 2.151                  | 5.744         | 4.679     | 0.785 |
|         | S8      | 4712                            | 609              | 205        | 2.484 | 0.112 | 41                | 1.543                  | 5.935         | 5.327     | 0.844 |

Table S1. Paper data compilation part 1 - Topography results

| Gully   | FLM-Iav   |           | FLM-I60   |           | FLM-I30   |           | FLM-I15   |           | FLM-      | SM        | FL-SM     |
|---------|-----------|-----------|-----------|-----------|-----------|-----------|-----------|-----------|-----------|-----------|-----------|
|         | Area (m²) | Width (m) | Area (m²) | Area (m²) | Area (m²) |
| Gully 1 | 0.071     | 0.299     | 0.208     | 0.970     | 0.301     | 1.193     | 0.288     | 1.309     | 0.306     | 0.380     | 0.301     |
|         | 0.283     | 0.476     | 0.862     | 1.423     | 1.047     | 1.720     | 1.106     | 1.877     | 1.094     | 1.685     | 1.047     |
|         | 0.165     | 0.331     | 0.500     | 0.992     | 0.871     | 1.215     | 0.866     | 1.325     | 0.494     | 1.118     | 0.871     |
|         | 0.050     | 0.173     | 0.172     | 0.542     | 0.216     | 0.663     | 0.210     | 0.726     | 0.641     | 0.388     | 0.216     |
|         | 0.006     | 0.061     | 0.023     | 0.222     | 0.028     | 0.274     | 0.039     | 0.298     | 0.043     | 0.082     | 0.028     |
| Gully 2 | -         | -         | -         | -         | 1.170     | 1.669     | -         | -         | 1.248     | 2.173     | 1.170     |
|         | 0.207     | 0.431     | 0.624     | 1.303     | 1.359     | 1.592     | 1.142     | 1.738     | 2.324     | 2.276     | 2.276     |
|         | 0.278     | 0.401     | 0.855     | 1.199     | 1.369     | 1.467     | 1.474     | 1.556     | 2.029     | 1.968     | 1.968     |
|         | 0.100     | 0.326     | 0.315     | 0.984     | 0.567     | 1.206     | 0.505     | 1.318     | 0.860     | 0.590     | 0.567     |
|         | 0.049     | 0.137     | 0.153     | 0.431     | 0.279     | 0.532     | 0.211     | 0.581     | 0.940     | 0.473     | 0.279     |
| Gully 3 | 0.002     | 0.060     | 0.005     | 0.154     | 0.006     | 0.187     | 0.007     | 0.203     | 0.014     | 0.006     | 0.006     |
|         | -         | -         | -         | -         | 1.202     | 1.287     | -         | -         | 1.721     | 1.690     | 1.690     |
|         | -         | -         | -         | -         | 0.477     | 1.081     | -         | -         | 0.791     | 0.917     | 0.477     |
|         | 0.328     | 0.641     | 0.961     | 1.877     | 1.171     | 2.288     | 2.003     | 2.493     | 1.192     | 1.752     | 1.171     |
|         | 0.160     | 0.522     | 0.478     | 1.562     | 1.021     | 1.912     | 0.914     | 2.086     | 1.101     | 0.803     | 1.021     |
| Gully 3 | 0.048     | 0.242     | 0.152     | 0.740     | 0.254     | 0.909     | 0.234     | 0.991     | 0.273     | 0.289     | 0.254     |
|         | 0.008     | 0.067     | 0.022     | 0.189     | 0.028     | 0.239     | 0.031     | 0.268     | 0.068     | 0.086     | 0.028     |
|         | 0.120     | 0.392     | 0.379     | 1.183     | 0.660     | 1.450     | 0.582     | 1.584     | 0.558     | 0.661     | 0.660     |
|         | -         | -         | -         | -         | 2.193     | 2.275     | -         | -         | 2.626     | 3.596     | 3.596     |
|         | -         | -         | -         | -         | 1.832     | 2.318     | -         | -         | 2.173     | 3.025     | 1.832     |
|         | -         | -         | -         | -         | 1.891     | 2.250     | -         | -         | 2.359     | 3.279     | 1.891     |

**Table S2.** Paper data compilation part 2 - Model results

| Gully | Volume<br>(Total Station) | Volume<br>(UAV) | Error<br>volume | Length | Max.<br>Width | Max.<br>Depth | Channel<br>area | Coordinates UTM<br>(zone: 23S) |         |
|-------|---------------------------|-----------------|-----------------|--------|---------------|---------------|-----------------|--------------------------------|---------|
|       | (m³)                      | (m³)            | (%)             | (m)    | (m)           | (m)           | (m²)            | X (m)                          | Y (m)   |
| 1     | 20                        | 22.5            | 11%             | 45.5   | 3.7           | 0.709         | 150             | 445297                         | 9449332 |
| 2     | 38                        | 33.5            | 13%             | 33.1   | 5.8           | 0.694         | 320             | 444614                         | 9447240 |
| 3     | 69                        | -               | -               | 37.4   | 8.4           | 0.844         | 480             | 444883                         | 9447479 |

**Table S3.** Comparison of gullies dimensions.

| Land-use description | Condition                      | Soil Class |    |      |    |
|----------------------|--------------------------------|------------|----|------|----|
|                      |                                | A          | B  | C    | D  |
| Cultivated land      | with conservation treatment    | 62         | 71 | 78   | 81 |
|                      | without conservation treatment | 72         | 81 | 88   | 91 |
| Pasture              | good                           | 39         | 61 | 74   | 80 |
|                      | bad                            | 68         | 79 | (86) | 89 |

**Table S4.** CN values by land-use (Chow et al., 1988). In parenthesis the CN adopted in this study.

## 60 4.1 Fortran Code

```

program FLSM

IMPLICIT NONE
CHARACTER arquivo*30,arquivo1*30,arquivo2*30
65 integer No,i
REAL Q(1500),n,S,Kr,Ds,Pa,Tc,Xnc,Gc,Rn,WP,Rh,Ta,Wn,Weq,Le,Delta,Param,Tmax,tm(1500),t(1500),tn
REAL NEL,Tb,Gcf,Xncf,Xnc1,Xnc2,Gc1,Gc2,Rn1,Rn2,WP1,Lim,Ch,Phi,Ang,Dvcr,g,pi,es,Ws
REAL WP2,Rh1,Rh2,Ta1,Ta2,Dg1,Dg2,Tnc1,Tnc2,Xncf1,Xncf2,gcf1,gcf2,tnf1,tnf2,dgf1,dgf2
REAL wi(1500),wf,dp(1500),depth,DeltaW,PerimF,AreaI,AreaF,Rh_S,Max_wi,Max_W,dW
70 COMMON /grand1/Gcf,Xncf1,Xncf2
COMMON /grand2/Ch,g,Ds,es,Pa,Phi,depth,Ang,pi

!Phi = internal friction angle of the soil (degrees) > the data can be obtained in the NAVFAC 7.02,
!based in texture; in Ortiz et al 1989 based in texture, Plasticity index and porosity or
75 !via laboratory experiments
!Ch = Cohesion (Pa) > the data can be obtained in the NAVFAC 7.02, based in texture;
!in Ortiz et al 1989 based in texture, Plasticity index and porosity or via laboratory experiments
!Lim = a threshold for application of sidorchuk routine
!Q = peak discharge (m3/s)
80 !tm = discharge's duration (min)
!n = Manning's number
!S = Slope (abs) - (not in degrees or percentage)

```



```

!Kr = rill erodibility factor (s/m)
!Tc = Critical shear stress (Pa)
85 !Xnc = Normalized distance in the WP where T=Tc (abs)
!Gc = Conveyance function at Xnc (abs)
!Rn = Normalized Hydraulic Radius (abs)
!WP = Wet Perimeter (m)
!Rh = Hydraulic Radius (m)
90 !Ta = Average shear stress (Pa)
!Wn = Normalized width (abs)
!Weq = equilibrium width (m)
!Er = Erosion rate (kg/m.s)
!Ve = Velocity of movement down (m/s)
95 !Pse = Weigth of soil eroded in the event (kg)
!Le = Sheet thickness of eroded soil(m)
!Param = A parameter that is repeated throughout the calculations
!t = time (s)
!NEL = Depth of nonerodible layer(m)
100 !Tb = Tension when the erosion reach the NEL (Pa)
!Gcf = conveyance funcion final (abs)
!Wf = final width of the channel (m)
!tne = time to reach the NEL (s)

105 WRITE(*,*)'*****'
WRITE(*,*)' Foster_Lane program '
WRITE(*,*)' '
WRITE(*,*)' Calculates the final total of soil '
WRITE(*,*)' eroded in an ephemeral gully '
110 WRITE(*,*)' for a time-serie rainfall '
WRITE(*,*)' '
WRITE(*,*)' Universidade Federal do Ceara '
WRITE(*,*)' Departamento de Engenharia Agricola '
WRITE(*,*)' Doutorado em Engenharia Agricola '
115 WRITE(*,*)' '
WRITE(*,*)' Pedro Alencar, 2019 '
WRITE(*,*)' '
WRITE(*,*)'*****'

120 No = 947 !Number of events

!1. READS INPUT DATA
!write(*,*)'Insert the number of observed events'
!Read(*,*)No
125 write(*,'(a)')'Insert the name of the file containing the runoff data (Discharge e Duration):
' !in the absense of measured data we sugest use the 30-min intensity

```

```

Read(*,'(a30)')arquivo1
write(*,'(a)')'Insert the name of the file containing the hillslope and soil data: '
Read(*,'(a30)')arquivo2
130 WRITE(*,'(a)',advance='no') 'Insert the name of the output file: '
READ(*,'(a30)')arquivo
open(50,file=arquivo1)
    do i=1, No
        read(50,*) Q(i),tm(i)
135        write(*,*) Q(i),tm(i)
        t(i)=tm(i)*60.
    end do
close(50)
open(60,file=arquivo2)
140    read(60,*)n,S,Tc,kr,Ds,es,NEL,Ch,Phi,Lim
    write(*,*)'The number of Manning of the channel is....',n
    write(*,*)'The declivity of the hillslope is.....',S
    write(*,*)'The critical shear stress is.....',Tc
    write(*,*)'The rill erodibility coefficient is.....',Kr
145    write(*,*)'The soil Bulk density is.....',Ds
    write(*,*)'The porosity of the soil is.....',es
    write(*,*)'The depth of the nonerodible layer is.....',NEL
    write(*,*)'The soil cohesion is.....',Ch
    write(*,*)'The internal friction angle is.....',Phi
150    write(*,*)'The threshold for wall erosion is.....',Lim
close(60)
Pa = 9803. !N/m³
g = 9.803 !gravity
i = 1
155 depth = 0
AreaI = 0
Max_wi = 0
Max_W = 0
pi = 3.1415926536
160 Phi = Phi*pi/180.
Ws = 0.
i=1

!2. FOSTER AND LANE EQUATIONS FOR INCISION BEFORE REACHING THE NEL
165 open(40,file=arquivo)
do while(i.le.No)
    Param = (n*Q(i)/(S**(0.5)))*0.375

    if (depth.lt.NEL) then
170        Gc = Pa*S*Param/Tc

```

```

if (Gc.lt.1.79) then
    i=i+1
    else

175         Delta = sqrt(3.9429**2 - 4*6.9594*(1/Gc))
        Xnc1 = (3.9429-Delta)/(2*6.9594)
        Xnc2 = (3.9429+Delta)/(2*6.9594)
        Rn1 = -0.8834*Xnc1+0.1395*Xnc1+0.151
        Rn2 = -0.8834*Xnc2+0.1395*Xnc2+0.151

180    end if
    if (Rn1.gt.0) then
        WP1 = Param/Rn1**(0.625)
        Rh1 = Rn1*WP1
        Ta1 = Pa*Rh1*S
185        Tnc1 = Tc/Ta1
        Gc1 = 1./(Tnc1*(Rn1**0.375))
        Dg1 = abs(Gc-Gc1)
        else
            Gc1 = 0
190            Dg1 = abs(Gc-Gc1)
        end if
        if (Rn2.gt.0) then
            WP2 = Param/Rn2**(0.625)
            Rh2 = Rn2*WP2
195            Ta2 = Pa*Rh2*S
            Tnc2 = Tc/Ta2
            Gc2 = 1/(Tnc2*(Rn2**(0.375)))
            Dg2 = abs(Gc-Gc2)
            else
200                Gc2 = 0
                Dg2 = abs(Gc-Gc2)
            end if
            if (Dg1.gt.Dg2) then
                Xnc = Xnc2
205            else
                Xnc = Xnc1
            end if
            Write(*,*)'Xnc ',Xnc
            Wn = -1.4873*Xnc+0.7436
210            Rn = -0.8834*Xnc**2+0.1395*Xnc+0.151
            WP = Param/Rn**(0.625)
            Weq = WP*Wn
            Rh = Rn*WP
            Ta = Pa*Rh*S

```

```

215      Tmax = 1.35*Ta
      if (Tmax.lt.Tc) then
        Write(*,*)'The event didn't cause erosion.'
        wi(i) = 0.
        dp(i) = 0.
220      else
        wi(i) = Weq
        Le = Kr*(Tmax-Tc)*t(i)/Ds
        if (Le.gt.NEL) then
          dp(i) = NEL
225        else
          dp(i) = Le
        end if
        depth = depth + dp(i)
        if (Max_wi.lt.Weq) then
230          Max_wi = wi(i)
          Max_W = wi(i)
        end if
        AreaI = AreaI+wi(i)*dp(i)
        Write(40,*)'Fasel',i,wi(i),dp(i),Max_wi,AreaI
235      end if
    end if

!3. FOSTER AND LANE EQUATIONS FOR INCISION AFTER REACHING THE NEL
    if (depth.ge.NEL) then
240      Gcf = Pa*S*Param/Tc
      if (Gcf.lt.1.78) then
        i=i+1
      else
        CALL Newton_NEL
245      end if
      tnf1 = 1.35*(1-(1-2.*xncf1)**2.9)
      gcf1 = 1/(tnf1*(xncf1*(1-2*xncf1))**(0.375))
      dgf1 = abs(gcf-gcf1)
      tnf2 = 1.35*(1-(1-2.*xncf2)**2.9)
250      gcf2 = 1/(tnf2*(xncf2*(1-2*xncf2))**(0.375))
      dgf2 = abs(gcf-gcf2)
      if (dgf1.gt.dgf2) then
        xncf = xncf2
      else
255        xncf = xncf1
      end if
      Tb = 1.35*Ta*(1-(1-2*xncf)**2.9)*Pa*S*Param*(xncf*(1-2*xncf))**0.375
      if (Tb.le.Tc)then

```

```

        dW = 0
260     else
        dW = Kr*(Tb-Tc)/Ds
    end if

    wf = Param*((1-2.*xncf)/(xncf**1.667))**0.375
265     if (Max_W.ge.Wf) then
        tn = 0.
        else
            tn = t(i)*dW/(Wf-Max_W)
        end if
270     Max_W = (1-exp(-tn))*(Wf-Max_W)+Max_W
    write(40,*)'Fase2',i, Max_W, NEL, dw
    end if
    i = i+1
end do

275 DeltaW = Max_W-Max_Wi
AreaF = AreaI + DeltaW*depth
PerimF = Max_W + 2.*depth
Rh_S = AreaF/PerimF

280 !4. WALL TRANSFORMATION
if (AreaF.gt.Lim) then
    Dvcr = (2.*Ch*cos(Phi)/(g*Ds))/(sin(0.5*(Phi+pi/2.))**2.
    if (Dvcr.le.NEL) then
        CALL Newton_PHI
285     Ws = Max_W + 2.*NEL/tan(Ang)
        AreaF = NEL*(Max_W+Ws)/2.
    end if
end if

write(40,*)'The cross section area is: ',AreaF,' m2'
290 if (depth.lt.NEL) then
    write(40,*)'The depth is: ',depth,'m'
    write(40,*)' '
    write(40,*)'The erosion didn't reach the non erodible layer.'
    else
295     write(40,*)'The depth is: ',NEL,'m'
        write(40,*)' '
        write(40,*)'The erosion reached the non erodible layer.'
    end if
if (Ws.gt.0.) then
300     write(40,*)'There is erosion of the walls.'
    write(40,*)'The top width is',Ws,'m and the wall slope is',100.*tan(Ang),'%'
    write(40,*)Ang*180/pi

```

```

end if
write(*,*)' '
305 write(*,*)'Please, see the output file'

end program

Subroutine Newton_NEL
310 !Subrotina para calcular as raizes da equação de Xncf
implicit none
integer i,j
real x,xa,xb,f,df,erro,gcf,xncf1,xncf2
COMMON /grand1/Gcf,Xncf1,Xncf2
315 Xa = 0.1
Xb = 0.4
i=0
j=0
erro=1000000.
320 X=Xa
do while (erro.gt.0.000001)
f = -321.29*x**6+249.02*x**5+9.059*x**4-58.033*x**3+13.012*x**2+1.7199*x-0.004883*COS(x) -1/Gcf
df = -321.29*6*x**5+249.02*5*x**4+9.059*4*x**3-58.033*3*x**2+13.012*2*x+1.7199+0.004883*sin(x)

325 x = xa - f/df
erro = abs(x-xa)/xa
xa=x
i=i+1
end do
330 erro=1000000.
x=Xb
do while (erro.gt.0.000001)
f = -321.29*x**6+249.02*x**5+9.059*x**4-58.033*x**3+13.012*x**2+1.7199*x-0.004883*COS(x) -1/Gcf
df = -321.29*6*x**5+249.02*5*x**4+9.059*4*x**3-58.033*3*x**2+13.012*2*x+1.7199+0.004883*sin(x)
335 x = xb - f/df
erro = abs(x-xb)/xb
xb=x
j=j+1
340 end do
Xncf1 = xa
Xncf2 = xb
end subroutine

345 Subroutine Newton_PHI
!Subroutine to calculate wall stable angle

```

```

implicit none

integer i

350 real k1,k2,f1,df1,x,xa,erro,Ch,g,Ds,es,Pa,Phi,depth,Ang,pi
COMMON /grand2/Ch,g,Ds,es,Pa,Phi,depth,Ang,pi

i=0
k1 = Ch/(g*Ds*depth)
355 k2 = tan(Phi)*(Ds - es*1000.)/1000.

erro=1000000.
x = pi/4.
do while (erro.gt.0.00000001)

360 f1 = k2*(cos(x))**2 - sin(2*x)/2. - k1
df1 = -2*k2*cos(x) - cos(2*x)

xa = x - f1/df1
365 erro = abs(x-xa)
x=xa
i=i+1
end do
Ang = x
370 end subroutine

```

*Code and data availability.* Code and data available in the link: <https://github.com/PedroAlencarTUB/GullyModel-FLSM>

*Acknowledgements.* This study was partly financed by the *Coordenação de Aperfeiçoamento de Pessoal de Nível Superior - Brasil* (CAPES) - Finance Code 001, Capes/Print Grant 88881.311770/2018-01 and by the *Edital Universal* CNPq - number 407999/2016-7. Pedro Alencar is  
375 funded by the DAAD – Award Number: 91693642. Many thanks to Prof. Eva Paton for the support and advising at the Technische Universität Berlin.

## References

Chow, V. T., Maidment, D. R., and Mays, L. W.: Applied Hydrology, McGraw-Hill Education, 1988.

380 Foster, G. R. and Lane, L. J.: Erosion by concentrated flow in farm fields, in: D.B. Simons Symposium on Erosion and Sedimentation, p. 21, 1983.

Ritter, A. and Muñoz-Carpena, R.: Performance evaluation of hydrological models : Statistical significance for reducing subjectivity in goodness-of-fit assessments, Journal of Hydrology, 480, 33–45, <https://doi.org/10.1016/j.jhydrol.2012.12.004>, 2013.

Sidorchuk, A.: Dynamic and static models of gully erosion, Catena, 37, 401–414, [https://doi.org/10.1016/S0341-8162\(99\)00029-6](https://doi.org/10.1016/S0341-8162(99)00029-6), 1999.
