# Supplementary material for: Physically based model for gully simulation: application to the Brazilian semiarid region
Source: Copernicus journal article supplement (doi:10.5194/hess-24-4239-2020), 2020-08-28
Supplement: Supplementary file [file hess-24-4239-2020-supplement-title-page.pdf › hess-24-4239-2020-supplement-title-page.pdf]

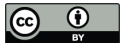

## *Supplement of*

# **Physically based model for gully simulation: application to the Brazilian semiarid region**

**Pedro Henrique Lima Alencar et al.**

*Correspondence to:* Pedro Alencar ([pedro.alencar@campus.tu-berlin.de](mailto:pedro.alencar@campus.tu-berlin.de)) and José Carlos de Araújo ([jcaraujo@ufc.br](mailto:jcaraujo@ufc.br))

- [hess-24-4239-2020-supplement-title-page.pdf](#)
- FLSM.f95
- README\_copernicus\_package\_5\_4.txt
- Supplement - hess-2019-460.pdf
- Supplement.tex
- copernicus.bst
- copernicus.cfg
- copernicus.cls
- figures
  - S1.png
  - S2.png
  - S3.png
  - S4.png
  - S5.png
  - S6.png
- natbib.sty
- pdfscreen.sty
- pdfscreencop.sty
- references.bib
- template.tex

The copyright of individual parts of the supplement might differ from the CC BY 4.0 License.
